# Supplementary material for: NOTCH1 as a Negative Regulator of Avian Adipocyte Differentiation: Implications for Fat Deposition
Source: MDPI journal article supplement (doi:10.3390/ani14040585), 2024-02-09

*Supplementary Material*

**NOTCH1 as a negative regulator of avian adipocyte differentiation: implications  
for fat disposition**

**Zheng Wang<sup>1†</sup>, Yue Su<sup>1†</sup>, Mingyu Zhao<sup>1</sup>, Zhenhua Ma<sup>1</sup>, Jianhui Li<sup>2</sup>, Zhuocheng  
Hou<sup>3</sup>, Huifeng Li<sup>1\*</sup>**

**\* Correspondence:** Huifeng Li, lhftom@sxau.edu.cn

**1 Supplementary Figures**

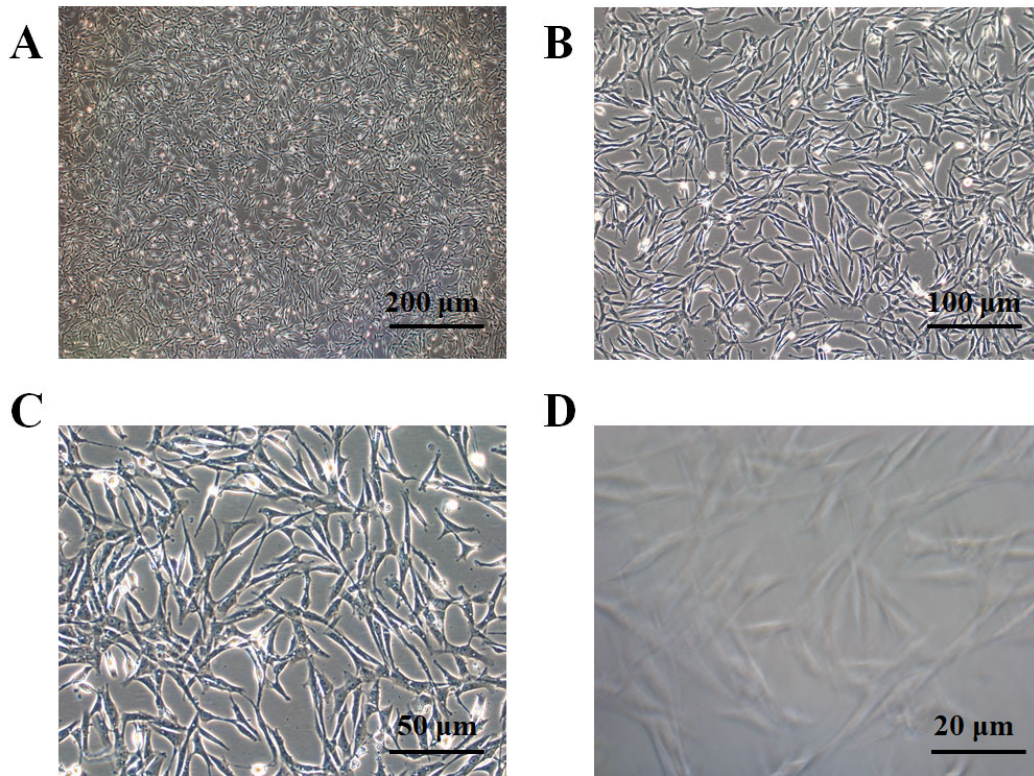

**Figure S1.** Representative phase contrast image of ICP1 cells approximately 24 h after seeding. (A) at 4× magnification objective. (B) at 10× magnification objective. (A) at 20× magnification objective. (B) at 40× magnification objective.

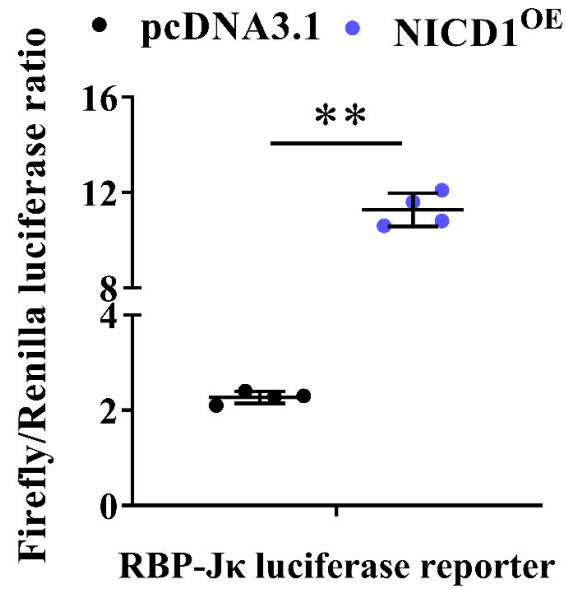

**Figure S2.** NICD1 promoted the relative luciferase activity dependent on RBP-J $\kappa$  site (n=4). Data are shown as mean  $\pm$  SD and significance was determined using Student's *t*-tests. \*\* $P < 0.01$ .

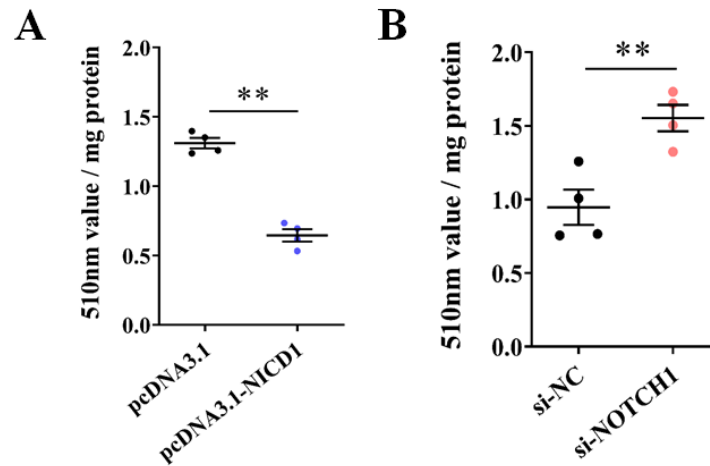

**Figure S3.** Quantification of Oil-Red-O staining after *NOTCH1* overexpression or knockdown or control. (A) Comparison of the lipid droplet content in NICD1 overexpression ICP1 cells and control cells obtained by oil red O staining and

extraction methods (n=4). (B) Comparison of the lipid droplet content in *NOTCH1* knockdown ICP1 cells and control cells (n=4). Data are shown as mean  $\pm$  SD and significance was determined using Student's *t*-tests.  $**P < 0.01$ .

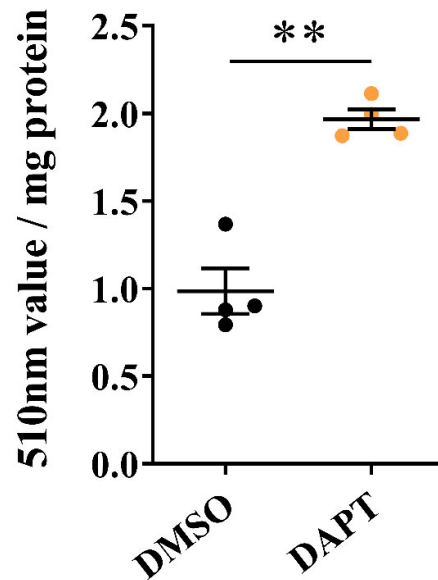

**Figure S4.** Quantification of Oil-Red-O staining after DAPT or DMSO treatment (n=4). Data are shown as mean  $\pm$  SD and significance was determined using Student's *t*-tests.  $**P < 0.01$ .

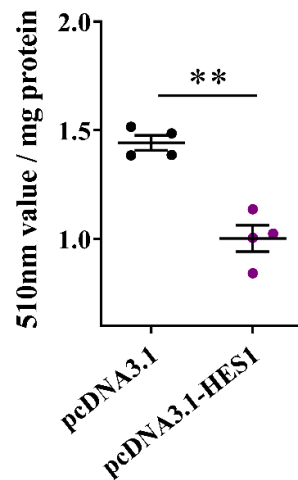

**Figure S5.** Quantification of Oil-Red-O staining after *HES1* overexpression or control. (n=4). Data are shown as mean  $\pm$  SD and significance was determined using Student's *t*-tests. \*\* $P < 0.01$ .

**Table S1.** The putative binding sites of transcription factor *HES1* within 2000 bp upstream region of *cPPAR $\gamma$ 2* transcript (Chr12: 5018144- 5020143).

| Putative binding sites | Start   | End     | Strand | Score |
|------------------------|---------|---------|--------|-------|
| GGCGCGTG               | 5020107 | 5020114 | +      | 12.92 |
| GGCGCGTGAA             | 5020107 | 5020116 | +      | 9.77  |
| GGCGTGTG               | 5019635 | 5019642 | +      | 8.44  |
| CGCGCGCG               | 5019168 | 5019175 | +      | 8.35  |
| CGCGCGCG               | 5019168 | 5019175 | -      | 8.35  |
| TTCACGCGCC             | 5020107 | 5020116 | -      | 8.92  |
| GGCGTGTGGG             | 5019635 | 5019644 | +      | 8.87  |
| CGCGCGCGGG             | 5019166 | 5019175 | -      | 8.77  |
| TTCACGCG               | 5020109 | 5020116 | -      | 7.47  |
| GGCGCGAGCC             | 5019385 | 5019394 | +      | 8.37  |

## 2 The original images of staining cells:

**Figure 3A**

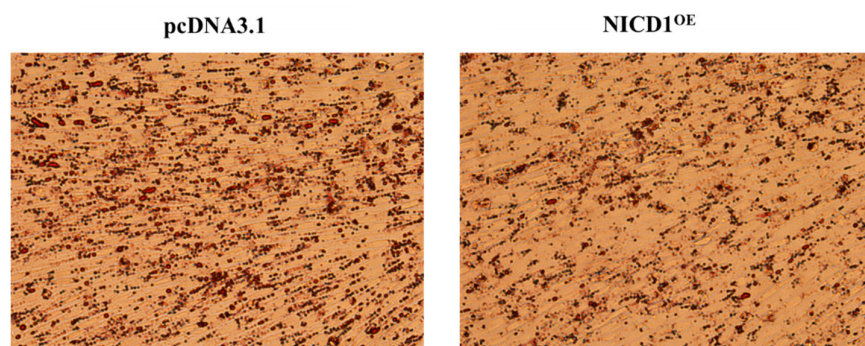

**Figure 3C**

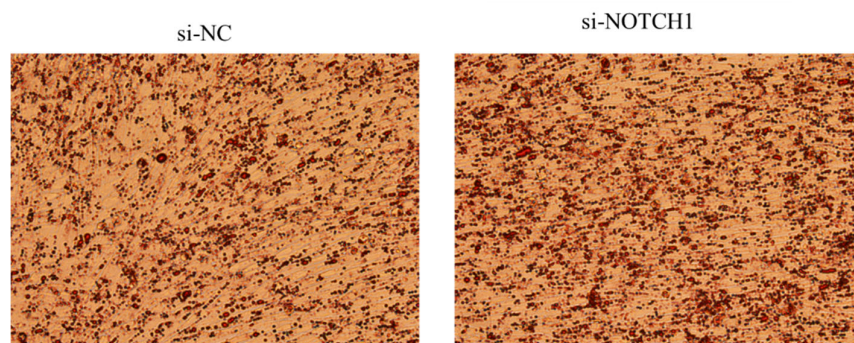

**Figure 4E**

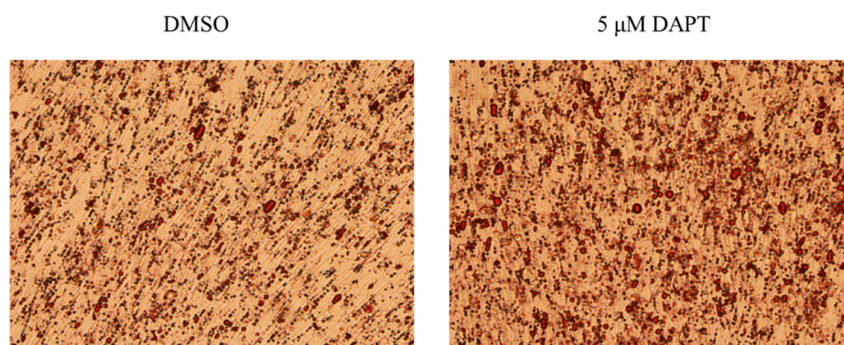

**Figure 5A**

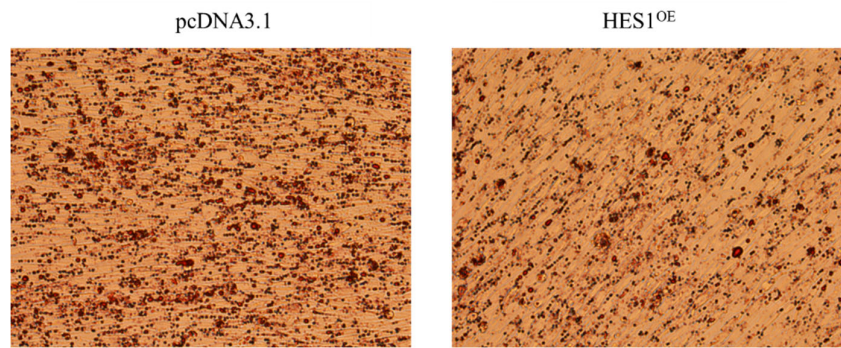

### 3 The original Western blot figures:

Figure 1B

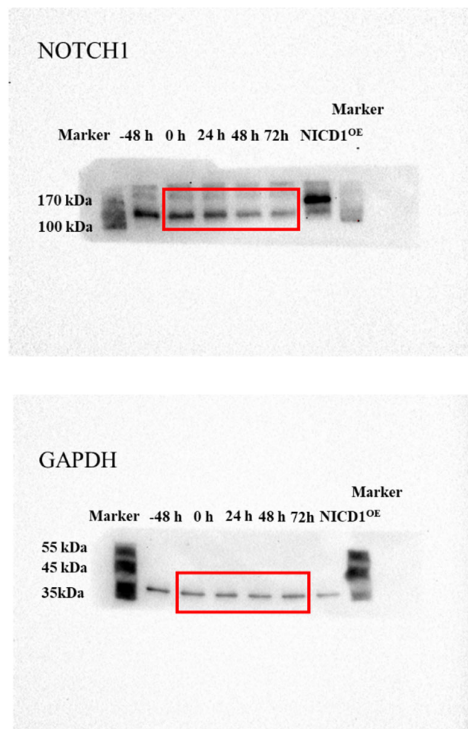

Figure 2A

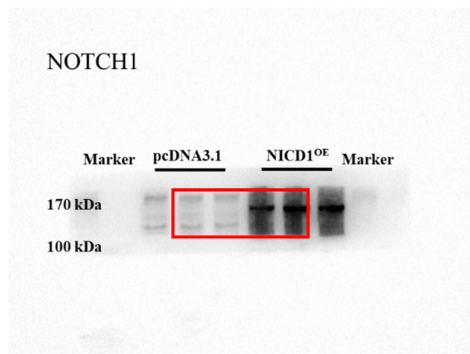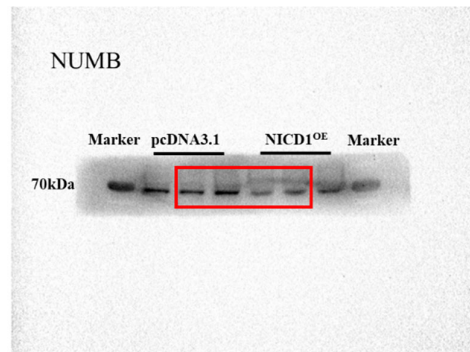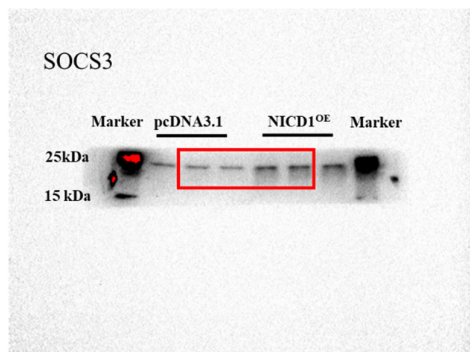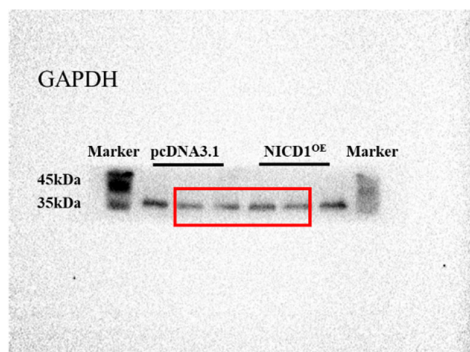

**Figure 2C**

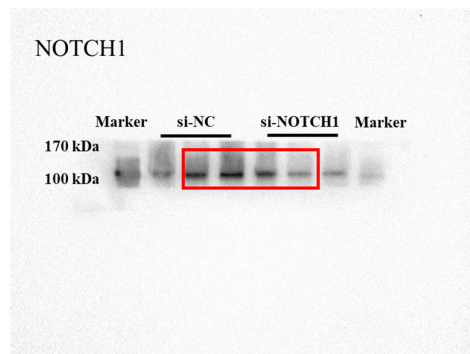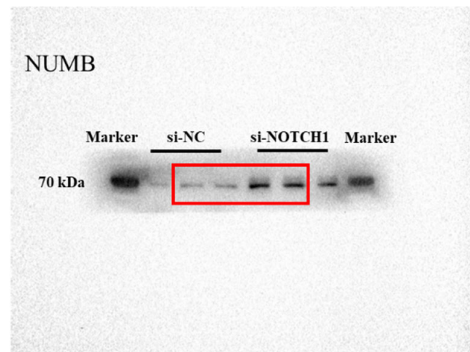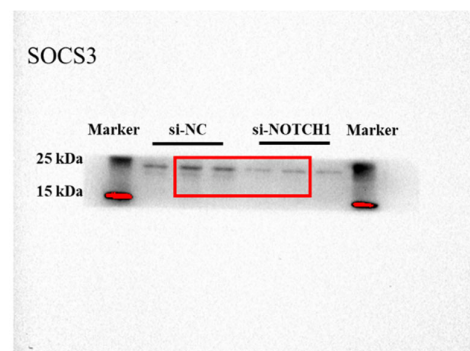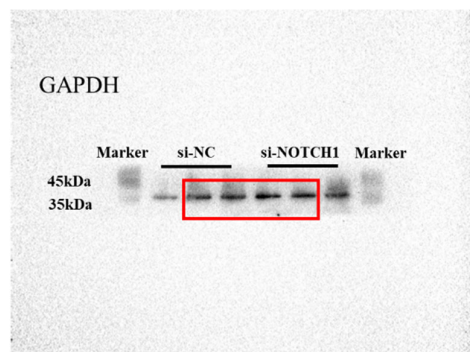

**Figure 4A**

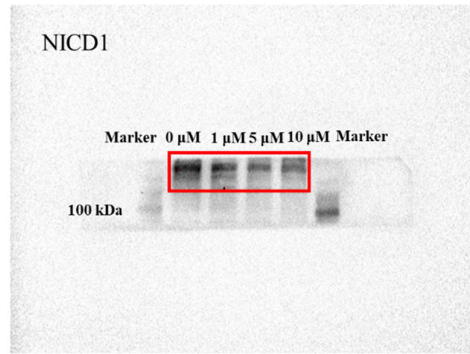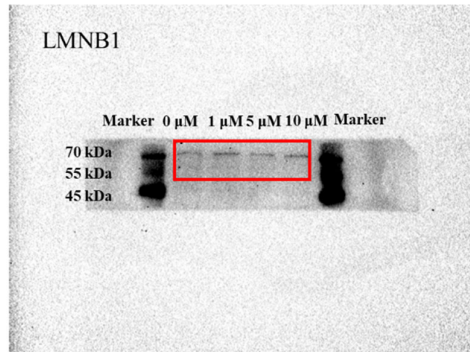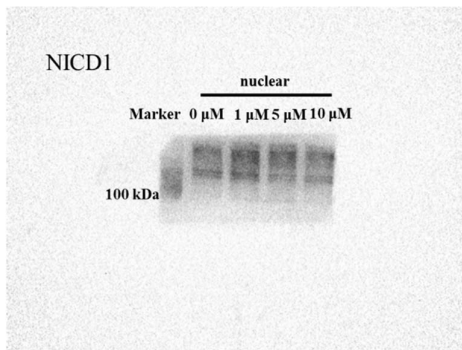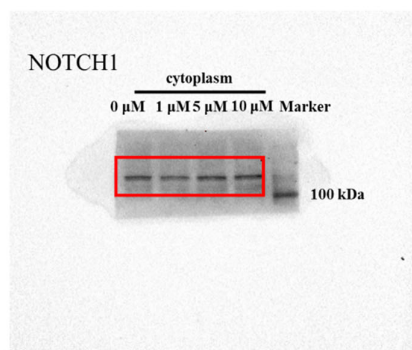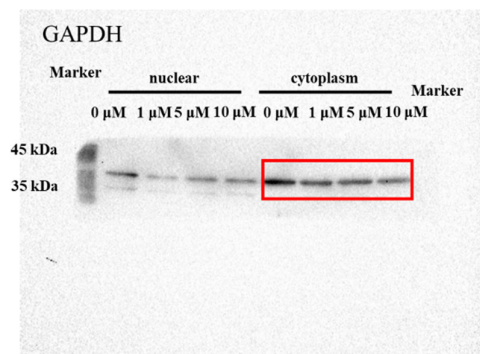

Supplement: s1 [file s1]
